# Supplementary material
Source: PubMed Central journal article supplement (PMC7279639)
Supplement: la9b03912_si_001.pdf [file la9b03912_si_001.pdf]

# Ligand Distribution and Lipid Phase Behavior in Phospholipid-Coated Microbubbles and Monolayers

*Simone A. G. Langeveld<sup>1</sup>, Christian Schwieger<sup>2,3</sup>, Inés Beekers<sup>1</sup>, Jacob Blaffert<sup>2</sup>, Tom van Rooij<sup>1</sup>,  
Alfred Blume<sup>2</sup>, Klazina Kooiman<sup>1</sup>*

<sup>1</sup> Department of Biomedical Engineering, Thoraxcenter, Erasmus MC, 3000 CA Rotterdam, The Netherlands

<sup>2</sup> Physical Chemistry, Institute of Chemistry, Martin Luther University Halle-Wittenberg, 06099 Halle (Saale), Germany

<sup>3</sup> Institute for Biochemistry and Biotechnology, Interdisciplinary Research Center HALOmem, Martin Luther University Halle-Wittenberg, Charles Tanford Protein Center, 06120 Halle (Saale), Germany

## Table of contents

**Supplemental Figure 1.** Typical example of 2D heatmaps from an indirect DSPC microbubble with a diameter of 5.7  $\mu\text{m}$ .

**Supplemental Figure 2.** Theoretical calculation of the mushroom to brush transition for the binary and ternary mixture.

**Supplemental Figure 3.** Compression isotherms of pure DPPC- $\text{d}_{62}$  and DSPC- $\text{d}_{70}$  at the air/water interface.

**Supplemental Figure 4.** Wavenumbers of antisymmetric and symmetric  $\text{CD}_2$  and  $\text{CH}_2$  stretching vibration of the ternary mixtures DPPC- $\text{d}_{62}$  / DSPE-PEG2000 / PEG40-stearate and DSPC- $\text{d}_{70}$  / DSPE-PEG2000 / PEG40-stearate as function of the surface pressure.

**Supplemental Figure 5.** Compression of a pure DPPC monolayers with simultaneous recording of the compression isotherm (black line, left y-axis) and IRRA spectra.

**Supplemental Figure 6.** Principal component analysis of IRRA spectra recorded during the compression of a pure DPPC- $\text{d}_{62}$  monolayer.

**Supplemental Video 1.** 3D render of direct DPPC microbubble (diameter = 4.7  $\mu\text{m}$ ) coated with DPPC, PEG40-stearate, and DSPE-PEG2000 (84.8:8.2:7.0). The video shows the ligand distribution (Oregon Green 488, top left panel), the LE phase (Rhodamine-DHPE, top right panel) and a composite of both signals (bottom left panel, green = ligand, red = LE phase).

**Supplemental Video 2.** 3D render of direct DSPC microbubble (diameter = 4.9  $\mu\text{m}$ ) coated with DSPC, PEG40-stearate, and DSPE-PEG2000 (84.8:8.2:7.0). The video shows the ligand distribution (Oregon Green 488, bottom left panel), the LE phase (Rhodamine-DHPE, bottom right panel) and a composite of both signals (top left panel, green = ligand, red = LE phase).

**Supplemental Video 3.** 3D render of direct DSPC microbubble (diameter = 3.4  $\mu\text{m}$ ) coated with DSPC, PEG40-stearate, and DSPE-PEG2000 (84.8:8.2:7.0). The video shows the ligand distribution (Oregon Green 488, top left panel), the LE phase (Rhodamine-DHPE, top right panel) and a composite of both signals (bottom left panel, green = ligand, red = LE phase).

**Supplemental Video 4.** 3D render of indirect DSPC microbubble (diameter = 5.3  $\mu\text{m}$ ) coated with DSPC, PEG40-stearate, and DSPE-PEG2000 (84.8:8.2:7.0). The video shows the ligand distribution (Oregon Green 488, top left panel), the LE phase (Rhodamine-DHPE, top right panel) and a composite of both signals (bottom left panel, green = ligand, red = LE phase).

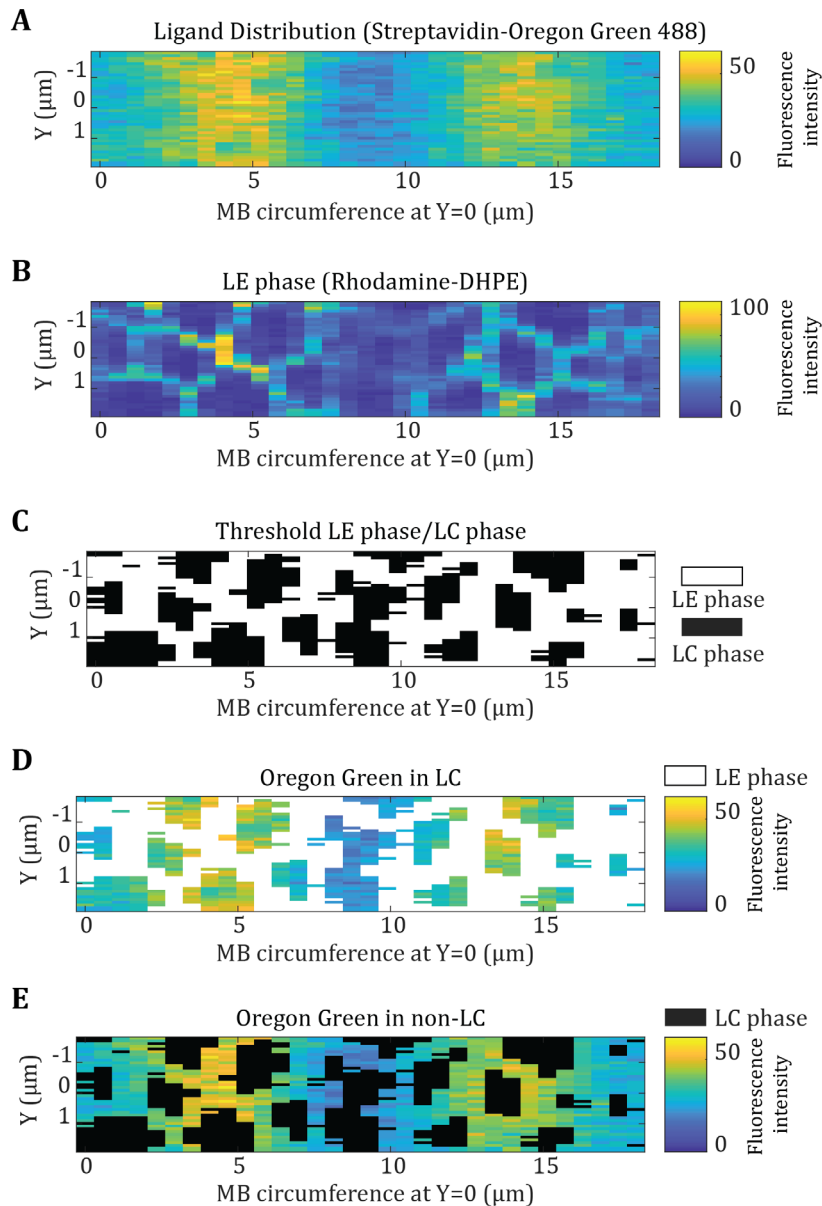

**Supplemental Figure 1.** Typical example of 2D heatmaps of an indirect DSPC microbubble with a diameter of 5.7  $\mu\text{m}$ . Mean fluorescence pixel intensity ( $I_{\text{part}}$ ) of A) the ligand (Streptavidin-Oregon Green 488) and B) the LE phase (Rhodamine-DHPE). C) Thresholded image with LC phase area in black and inter-domain region in white. Masked image of ligand fluorescence intensity in D) LC phase area (median 34.26) and E) inter-domain region (median 34.13, colocalization ratio 1.00).

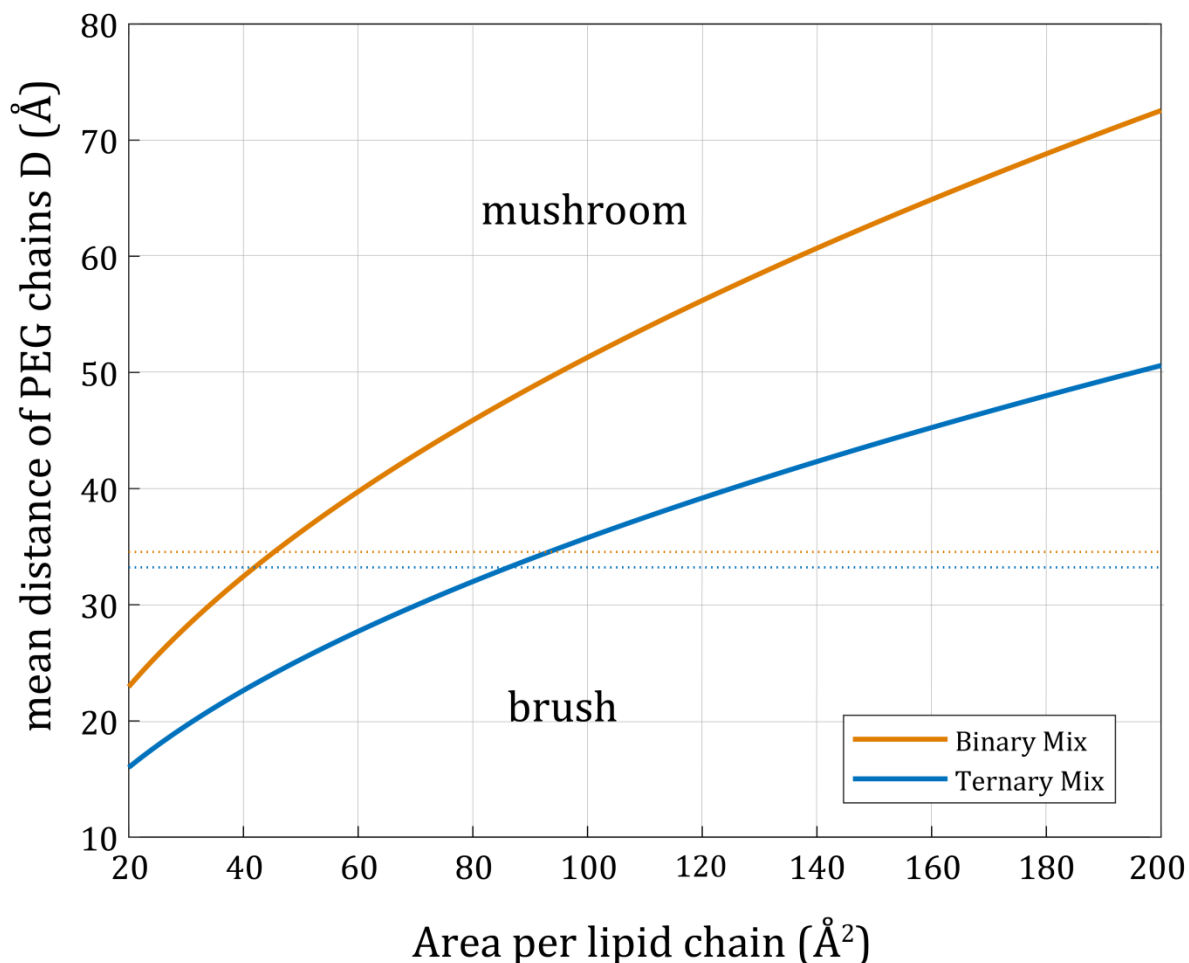

**Supplemental Figure 2.** Theoretical calculation of the mushroom to brush transition for the binary and ternary mixture. The solid lines are the calculations using Equation 2,  $D = \sqrt{\frac{A_{lipid}}{m}}$  from Abou-Saleh et al.<sup>1</sup>, where  $D$  is the mean distance between PEG chains,  $A_{lipid}$  the area occupied per lipid chain, and  $m$  the mole fraction of PEG / lipid chain. For the binary mixture (orange solid line), an  $m$  of 0.038, i.e. 7.6 mol% PEG / (2\*100) lipid chains, was used while this was 0.0781 for the ternary mixture (15 mol% PEG / (2\*85 + 2\*7 + 1\*8) lipid chains) (blue solid line). The dotted lines show the Flory radius calculated from Equation 1,  $R_F = aN^{3/5}$  from Abou-Saleh et al.<sup>1</sup>, where  $R_F$  is the Flory radius of the grafted PEG,  $a$  the size of the monomer (=0.35 nm), and  $N$  is the number of monomers per chain. For the binary mixture (orange dotted line), an  $N$  set to 2000 / 44 (mean molecular weight of the Polymer chain / monomer molecular weight), while for the ternary mixture (blue dotted line), which contains PEG chains of slightly different length a weighted average of  $N = 44.24$  was used ( $8/15 * 40 + 7/15*(2000/44)$ ). The mushroom to brush transition is predicted where dotted and solid lines intersect, i.e. where the mean PEG chain distance becomes smaller than the Flory radius.

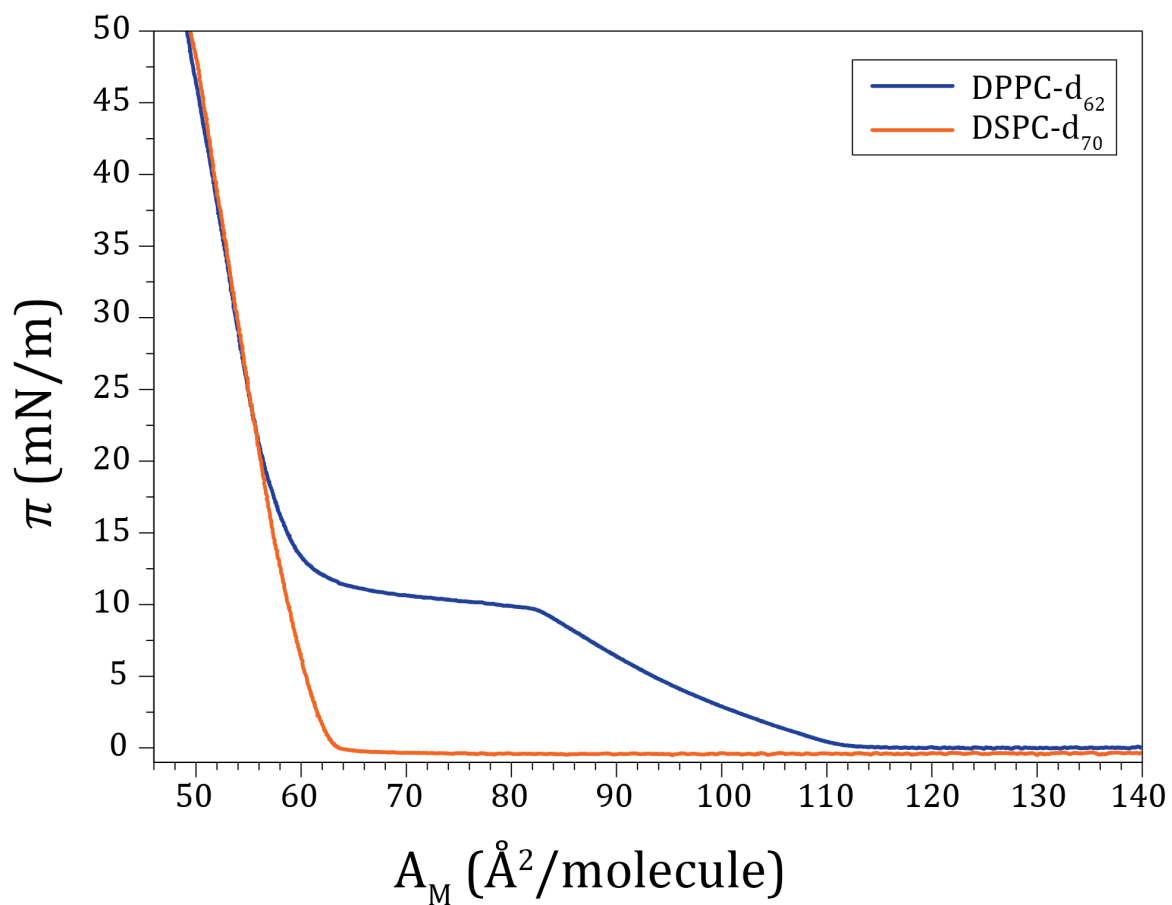

**Supplemental Figure 3.** Compression isotherms of pure DPPC-d<sub>62</sub> and DSPC-d<sub>70</sub> at the air/water interface. Graph of surface pressure ( $\pi$ ) as a function of the area per molecule ( $A_M$ ). Experiments performed at 20 °C.

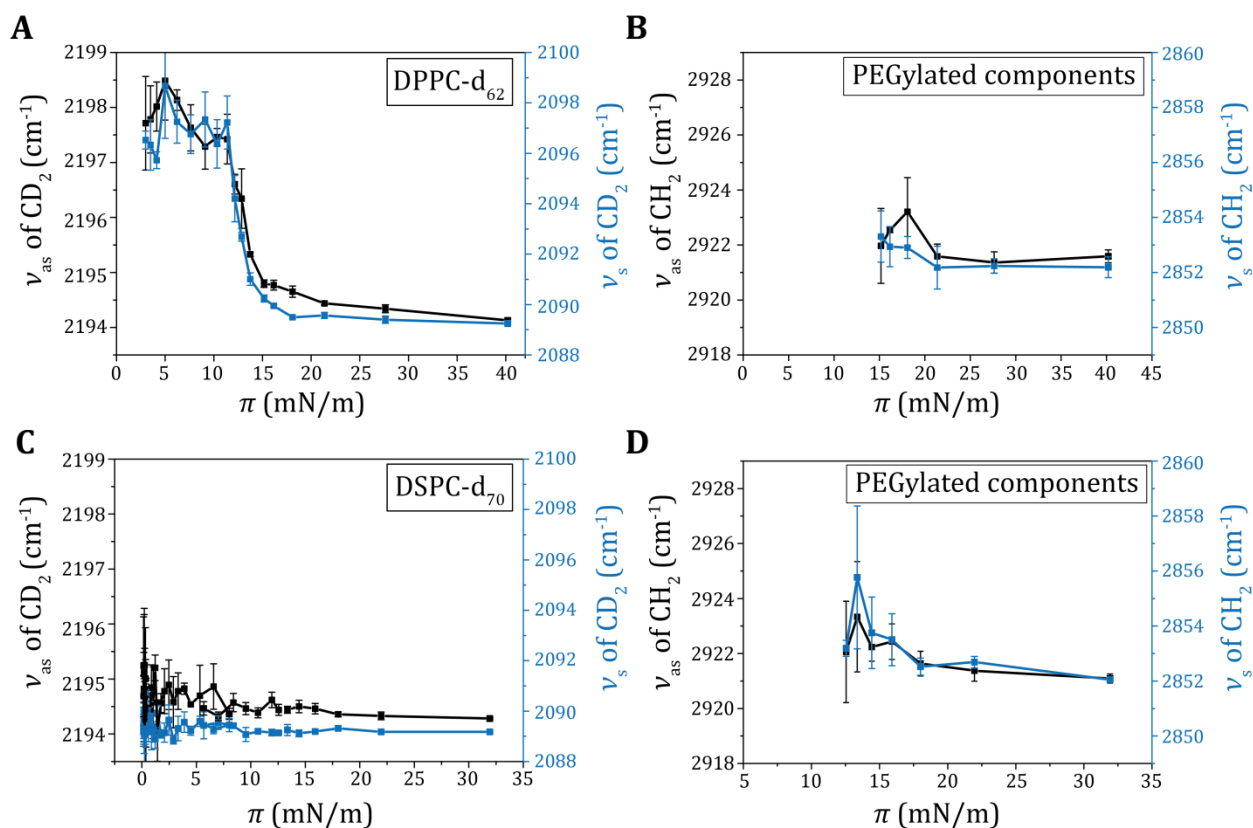

**Supplemental Figure 4.** Wavenumbers ( $\tilde{\nu}$ ) of antisymmetric ( $\nu_{as}$ ) and symmetric ( $\nu_s$ ) CD<sub>2</sub> (A, C) and CH<sub>2</sub> (B, D) stretching vibration of the ternary mixtures DPPC-d<sub>62</sub> / DSPE-PEG2000 / PEG40-stearate (A, B) and DSPC-d<sub>70</sub> / DSPE-PEG2000 / PEG40-stearate (C, D) (84.8:7.0:8.2 mol%) as function of the surface pressure ( $\pi$ ). Note the difference in  $x$ -axis of 3A, 3B, 3C, and 3D.

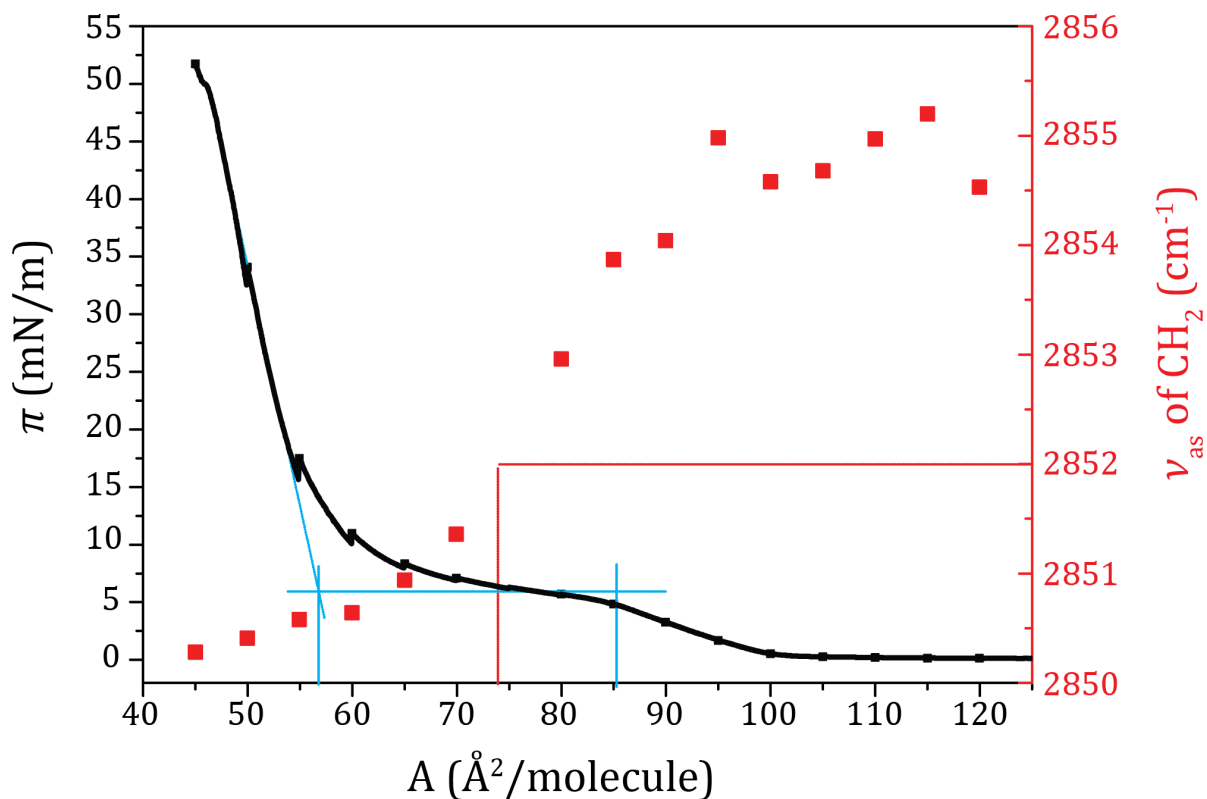

**Supplemental Figure 5.** Compression of a pure DPPC monolayer with simultaneous recording of the compression isotherm (black line, left y-axis) and IRRA spectra. Wavenumbers of antisymmetric  $\text{CH}_2$  stretching vibrations ( $\nu_{\text{as}}$  of  $\text{CH}_2$ ) are shown as red symbols (right y-axis). The blue perpendicular lines indicate the limits of the LE to LC phase transition plateau. The phase transition pressure is marked with a blue horizontal line at ca. 6 mN/m. The position of  $\nu_{\text{as}}$  at  $2852 \text{ cm}^{-1}$  (marked with a red line) is indicative for a partly ordered monolayer state with LE and LC phase co-existence, where the majority of the lipids is still in the LE state and the minority in the LC state. The LE/LC ratio as estimated from the position in the transition plateau was approximately 1.5 (or 60 % of the lipids are in LE, 40% are in LC).

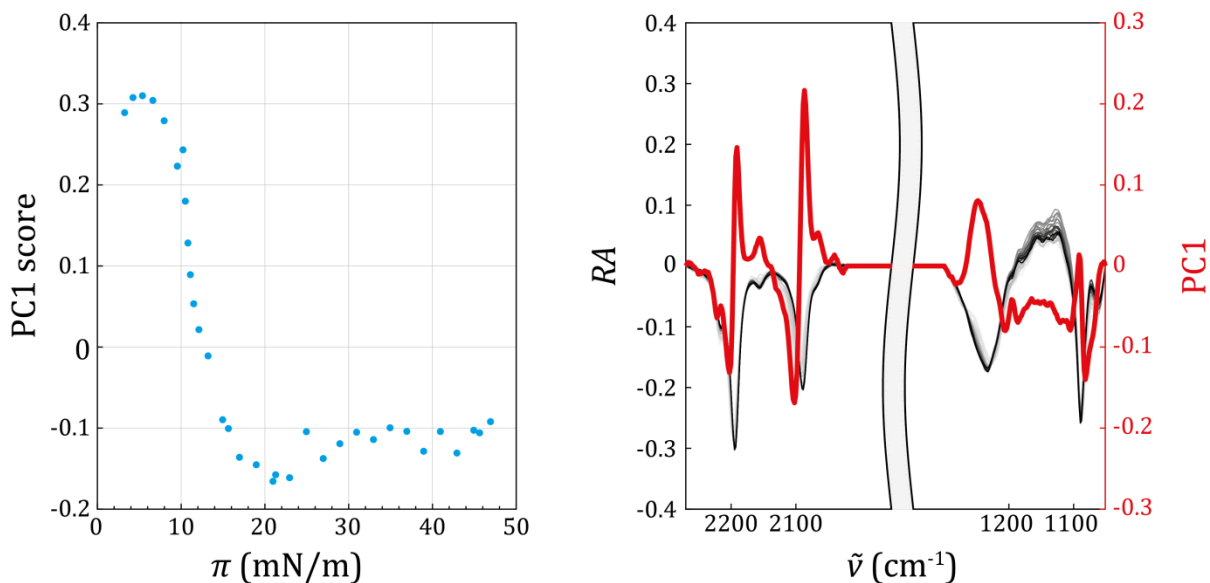

**Supplemental Figure 6.** Principal component analysis of IRRA spectra recorded during the compression of a pure DPPC-d<sub>62</sub> monolayer. IRRA spectra were simultaneously analyzed in the range of the headgroup vibrations (1050 – 1300 cm<sup>-1</sup>) and the CD<sub>2</sub> stretching vibrations (2020 – 2270 cm<sup>-1</sup>) after separate vector normalization in the two respective ranges. The left panel shows the PC1 scores as function of the surface pressure ( $\pi$ ). The right panel shows the reflection absorption ( $RA$ ) as a function of the wavenumber ( $\nu$ ) for different surface pressures (low – light grey, to high – dark grey, left y-axis), and the PC1 as a function of the wavenumbers ( $\tilde{\nu}$ ) (red line, right y-axis).

## References

1. Abou-Saleh, R. H.; Swain, M.; Evans, S. D.; Thomson, N. H., Poly(ethylene glycol) Lipid-Shell Microbubbles: Abundance, Stability, and Mechanical Properties. *Langmuir* **2014**, *30* (19), 5557-5563.
